# Supplementary material for: Incidence of retinal vein occlusion with long-term exposure to ambient air pollution
Source: PubMed Central journal article supplement (PMC6759191; doi:10.1371/journal.pone.0222895), 2019-09-24
Supplement: pone.0222895.s001.pdf [file pone.0222895.s001.pdf]

**S1 Table. Pearson’s correlation analysis for air pollutants at baseline from July 1, 1993 to December 31, 2013**

|                   | SO <sub>2</sub> | O <sub>3</sub>             | CO                         | CO <sub>2</sub>            | NO <sub>x</sub>     | NO                        | NO <sub>2</sub>           | PM <sub>10</sub>          | PM <sub>2.5</sub>         | THC                        | NMHC                       | CH <sub>4</sub>            |
|-------------------|-----------------|----------------------------|----------------------------|----------------------------|---------------------|---------------------------|---------------------------|---------------------------|---------------------------|----------------------------|----------------------------|----------------------------|
| SO <sub>2</sub>   | 1               | <b>-0.069</b> <sup>†</sup> | 0.379 <sup>†</sup>         | 0.306 <sup>†</sup>         | 0.378 <sup>†</sup>  | <b>0.264</b> <sup>†</sup> | <b>0.007</b> <sup>†</sup> | 0.384 <sup>†</sup>        | 0.484 <sup>†</sup>        | <b>0.257</b> <sup>†</sup>  | <b>0.294</b> <sup>†</sup>  | <b>0.124</b> <sup>†</sup>  |
| O <sub>3</sub>    |                 | 1                          | <b>-0.247</b> <sup>†</sup> | <b>-0.178</b> <sup>†</sup> | -0.346 <sup>†</sup> | -0.399 <sup>†</sup>       | <b>-0.001</b>             | <b>0.221</b> <sup>†</sup> | <b>0.268</b> <sup>†</sup> | <b>-0.103</b> <sup>†</sup> | <b>-0.184</b> <sup>†</sup> | <b>-0.010</b> <sup>†</sup> |
| CO                |                 |                            | 1                          | 0.378 <sup>†</sup>         | 0.911 <sup>†</sup>  | 0.863 <sup>†</sup>        | 0.750 <sup>†</sup>        | 0.343 <sup>†</sup>        | 0.383 <sup>†</sup>        | 0.717 <sup>†</sup>         | 0.850 <sup>†</sup>         | 0.303 <sup>†</sup>         |
| CO <sub>2</sub>   |                 |                            |                            | 1                          | 0.451 <sup>†</sup>  | 0.342 <sup>†</sup>        | 0.465 <sup>†</sup>        | 0.425 <sup>†</sup>        | 0.528 <sup>†</sup>        | 0.434 <sup>†</sup>         | 0.532 <sup>†</sup>         | <b>0.176</b> <sup>†</sup>  |
| NO <sub>x</sub>   |                 |                            |                            |                            | 1                   | 0.935 <sup>†</sup>        | <b>0.010</b> <sup>†</sup> | 0.351 <sup>†</sup>        | 0.323 <sup>†</sup>        | 0.686 <sup>†</sup>         | 0.826 <sup>†</sup>         | <b>0.277</b> <sup>†</sup>  |
| NO                |                 |                            |                            |                            |                     | 1                         | <b>0.007</b> <sup>†</sup> | <b>0.180</b> <sup>†</sup> | <b>0.134</b> <sup>†</sup> | 0.612 <sup>†</sup>         | 0.779 <sup>†</sup>         | <b>0.203</b> <sup>†</sup>  |
| NO <sub>2</sub>   |                 |                            |                            |                            |                     |                           | 1                         | <b>0.007</b> <sup>†</sup> | 0.519 <sup>†</sup>        | <b>0.006</b> <sup>†</sup>  | <b>0.006</b> <sup>†</sup>  | 0.347 <sup>†</sup>         |
| PM <sub>10</sub>  |                 |                            |                            |                            |                     |                           |                           | 1                         | 0.859 <sup>†</sup>        | 0.334 <sup>†</sup>         | 0.307 <sup>†</sup>         | <b>0.235</b> <sup>†</sup>  |
| PM <sub>2.5</sub> |                 |                            |                            |                            |                     |                           |                           |                           | 1                         | 0.363 <sup>†</sup>         | <b>0.284</b> <sup>†</sup>  | 0.321 <sup>†</sup>         |
| THC               |                 |                            |                            |                            |                     |                           |                           |                           |                           | 1                          | 0.828 <sup>†</sup>         | 0.799 <sup>†</sup>         |
| NMHC              |                 |                            |                            |                            |                     |                           |                           |                           |                           |                            | 1                          | 0.335 <sup>†</sup>         |
| CH <sub>4</sub>   |                 |                            |                            |                            |                     |                           |                           |                           |                           |                            |                            | 1                          |

SO<sub>2</sub>, sulfur dioxide; O<sub>3</sub>, ozone; CO, carbon monoxide; CO<sub>2</sub>, carbon dioxide; NO<sub>x</sub>, nitrogen oxides; NO, nitrogen monoxide; NO<sub>2</sub>, nitrogen dioxide; PM<sub>10</sub>, fine particulate matter < 10 µm in size; PM<sub>2.5</sub>, fine particulate matter < 2.5 µm in size; THC, total hydrocarbons; NMHC, nonmethane hydrocarbons; CH<sub>4</sub>, methane.

<sup>†</sup>Correlation significant at the 0.01 level (two-tailed).

**Correlation coefficient values of <0.3 denote a low strength of correlation, which qualified as the controlling pollutant in multiple-pollutant models of targeted pollutants.**
