# Supplementary material for: Incidence of retinal vein occlusion with long-term exposure to ambient air pollution
Source: PubMed Central journal article supplement (PMC6759191; doi:10.1371/journal.pone.0222895), 2019-09-24
Supplement: pone.0222895.s002.pdf [file pone.0222895.s002.pdf]

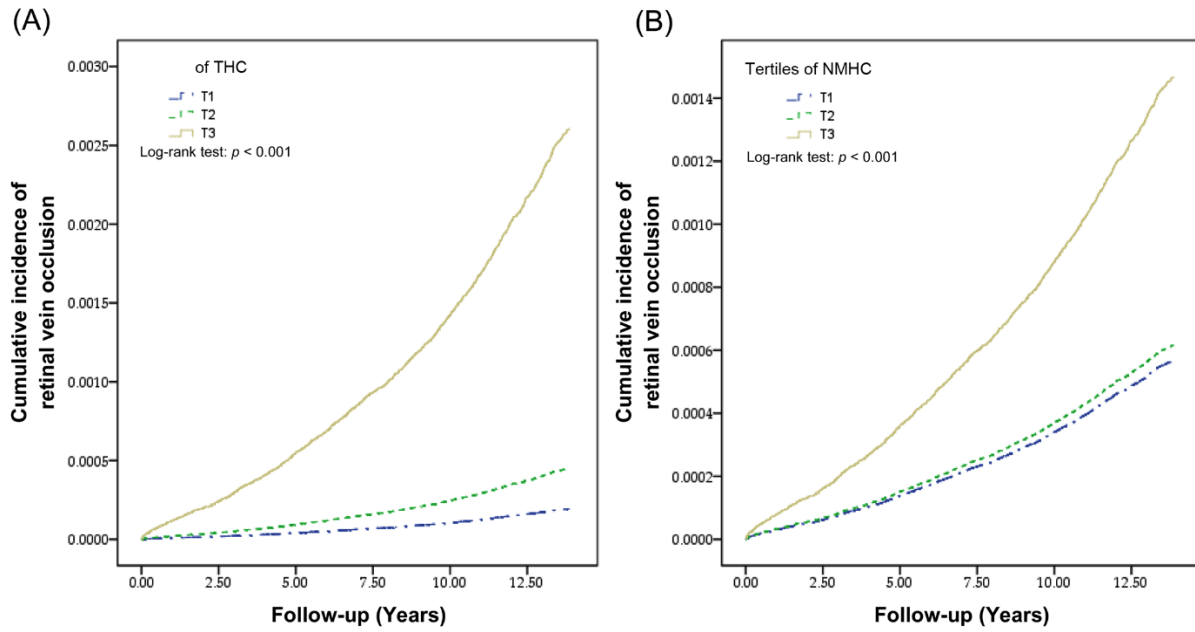

**S1 Fig. Cumulative incidence of retinal vein occlusion for individuals among tertiles of pollutant categories: (A) THC and (B) NMHC**

The tertile values, in ppm (THC, NMHC), were as follows: THC (T1 level:  $< 2.28$ , T2 level:  $\geq 2.28$  and  $< 2.40$ , T3 level:  $\geq 2.40$ ); NMHC (T1 level:  $< 0.29$ , T2 level:  $\geq 0.29$  and  $< 0.36$ , T3 level:  $\geq 0.36$ ).
