# Supplementary material for: Incidence of retinal vein occlusion with long-term exposure to ambient air pollution
Source: PubMed Central journal article supplement (PMC6759191; doi:10.1371/journal.pone.0222895), 2019-09-24
Supplement: pone.0222895.s003.pdf [file pone.0222895.s003.pdf]

# Long-Term Exposure to Airborne Hydrocarbons and Retinal Vein Occlusion Events

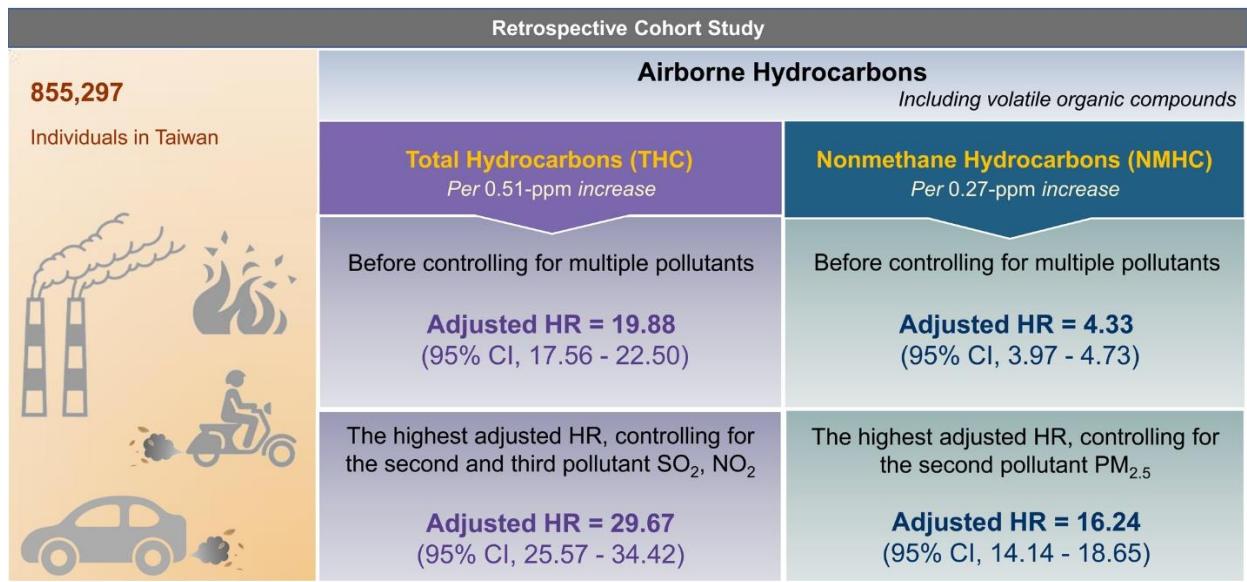

PLOS ONE

Zhang et al. 2019

S2 Fig. Visual abstract for the study
